# Supplementary material for: Strategically designed metal-free deep-ultraviolet birefringent crystals with superior optical properties
Source: Royal Society of Chemistry journal article supplement (doi:10.1039/d4sc04155k), 2024-01-01
Supplement: d4sc04155k1.pdf [file d4sc04155k1.pdf]

## Electronic Supplementary Information (ESI) for

### **Strategically designed metal-free deep-ultraviolet birefringent crystals with superior optical properties**

Yang Li,<sup>a</sup> Xinglong Chen<sup>b,\*</sup> and Kang Min Ok<sup>a,\*</sup>

<sup>a</sup> *Department of Chemistry, Sogang University, 35 Baekbeom-ro, Mapo-gu, Seoul 04107, Korea*

<sup>b</sup> *Materials Science Division, Argonne National Laboratory, Lemont, Illinois 60439, United States*

\*E-mail: kmok@sogang.ac.kr

**Table S1.** Crystallographic data for C(NH<sub>2</sub>)<sub>3</sub>CH<sub>3</sub>SO<sub>3</sub>.

|                                                              |                                                                             |
|--------------------------------------------------------------|-----------------------------------------------------------------------------|
| Formula                                                      | C(NH <sub>2</sub> ) <sub>3</sub> CH <sub>3</sub> SO <sub>3</sub>            |
| Formula weight                                               | 155.18                                                                      |
| Temperature/K                                                | 299.15                                                                      |
| Crystal system                                               | monoclinic                                                                  |
| Space group                                                  | <i>I</i> 2/ <i>m</i>                                                        |
| <i>a</i> /Å                                                  | 10.0029(11)                                                                 |
| <i>b</i> /Å                                                  | 7.3514(5)                                                                   |
| <i>c</i> /Å                                                  | 10.4776(7)                                                                  |
| <i>α</i> /°                                                  | 90                                                                          |
| <i>β</i> /°                                                  | 102.800(7)                                                                  |
| <i>γ</i> /°                                                  | 90                                                                          |
| Volume/Å <sup>3</sup>                                        | 751.33(11)                                                                  |
| <i>Z</i>                                                     | 4                                                                           |
| $\rho_{\text{calc}}$ g/cm <sup>3</sup>                       | 1.372                                                                       |
| $\mu$ /mm <sup>-1</sup>                                      | 0.382                                                                       |
| <i>F</i> (000)                                               | 328.0                                                                       |
| Crystal size/mm <sup>3</sup>                                 | 0.392 × 0.378 × 0.058                                                       |
| Radiation                                                    | MoK $\alpha$ ( $\lambda$ = 0.71073)                                         |
| 2 $\theta$ range for data collection/°                       | 6.382 to 55.2                                                               |
| Index ranges                                                 | -13 ≤ <i>h</i> ≤ 12, -9 ≤ <i>k</i> ≤ 9, -13 ≤ <i>l</i> ≤ 13                 |
| Reflections collected                                        | 6829                                                                        |
| Independent reflections                                      | 940 [ <i>R</i> <sub>int</sub> = 0.0735, <i>R</i> <sub>sigma</sub> = 0.0455] |
| Data/restraints/parameters                                   | 940/0/49                                                                    |
| Goodness-of-fit on <i>F</i> <sup>2</sup>                     | 1.202                                                                       |
| Final <i>R</i> indexes [ <i>I</i> ≥ 2 $\sigma$ ( <i>I</i> )] | <i>R</i> <sub>1</sub> = 0.0680, <i>wR</i> <sub>2</sub> = 0.1393             |
| Final <i>R</i> indexes [all data]                            | <i>R</i> <sub>1</sub> = 0.0775, <i>wR</i> <sub>2</sub> = 0.1432             |

<sup>[a]</sup> $R_1 = \sum ||F_o| - |F_c|| / \sum |F_o|$  and  $wR_2 = [\sum w (F_o^2 - F_c^2)^2 / \sum w F_o^4]^{1/2}$  for  $F_o^2 > 2\sigma(F_o^2)$

**Table S2.** Atomic coordinates ( $\times 10^4$ ) and equivalent isotropic displacement parameters ( $\text{\AA}^2 \times 10^3$ ) for  $\text{C}(\text{NH}_2)_3\text{CH}_3\text{SO}_3$ .  $U_{\text{eq}}$  is defined as 1/3 of the trace of the orthogonalized  $U_{ij}$  tensor.

| Atom | x          | y       | z          | $U_{\text{eq}}$ |
|------|------------|---------|------------|-----------------|
| S1   | 9534.4(11) | 0       | 2311.7(11) | 31.3(3)         |
| O1   | 872(3)     | 0       | 3209(3)    | 45.4(9)         |
| O2   | 9207(3)    | 8361(3) | 1522(2)    | 49.9(7)         |
| C2   | 8297(7)    | 0       | 3290(7)    | 79(2)           |
| N1   | 2262(3)    | 6559(4) | 4032(3)    | 44.8(8)         |
| N2   | 714(4)     | 5000    | 2480(4)    | 52.9(13)        |

**Table S3.** Interatomic distances ( $\text{\AA}$ ) for  $\text{C}(\text{NH}_2)_3\text{CH}_3\text{SO}_3$ .

| Atom | Atom            | Length   | Atom | Atom | Length   |
|------|-----------------|----------|------|------|----------|
| S1   | O1              | 1.455(3) | S1   | C2   | 1.774(6) |
| S1   | O2 <sup>1</sup> | 1.451(2) | N1   | C1   | 1.320(3) |
| S1   | O2              | 1.451(2) | N2   | C1   | 1.327(6) |

<sup>1</sup>+X, 2-Y, +Z

**Table S4.** Bond Angles ( $^\circ$ ) for  $\text{C}(\text{NH}_2)_3\text{CH}_3\text{SO}_3$ .

| Atom            | Atom | Atom            | Angle      | Atom            | Atom | Atom            | Angle      |
|-----------------|------|-----------------|------------|-----------------|------|-----------------|------------|
| O1              | S1   | C2              | 106.7(3)   | O2              | S1   | C2              | 106.32(18) |
| O2              | S1   | O1              | 112.37(13) | N1              | C1   | N1 <sup>2</sup> | 120.6(4)   |
| O2 <sup>1</sup> | S1   | O1              | 112.37(13) | N1 <sup>2</sup> | C1   | N2              | 119.7(2)   |
| O2              | S1   | O2 <sup>1</sup> | 112.3(2)   | N1              | C1   | N2              | 119.7(2)   |
| O2 <sup>1</sup> | S1   | C2              | 106.32(18) |                 |      |                 |            |

<sup>1</sup>+X,2-Y,+Z; <sup>2</sup>+X,1-Y,+Z

**Table S5.** Hydrogen Bonds for  $\text{C}(\text{NH}_2)_3\text{CH}_3\text{SO}_3$ .

| D  | H   | A               | $d(\text{D-H})/\text{\AA}$ | $d(\text{H-A})/\text{\AA}$ | $d(\text{D-A})/\text{\AA}$ | D-H-A/ $^\circ$ |
|----|-----|-----------------|----------------------------|----------------------------|----------------------------|-----------------|
| N1 | H1A | O2 <sup>1</sup> | 0.79                       | 2.15                       | 2.932(3)                   | 166.2           |
| N1 | H1B | O1              | 0.80                       | 2.13                       | 2.923(3)                   | 171.0           |
| N2 | H2  | O2 <sup>2</sup> | 0.81                       | 2.11                       | 2.915(3)                   | 174.8           |

<sup>1</sup>1/2+X,3/2-Y,1/2+Z; <sup>2</sup>+X,1-Y,+Z

**Table S6.** Hydrogen Atom Coordinates ( $\text{\AA}\times 10^4$ ) and Isotropic Displacement Parameters ( $\text{\AA}^2\times 10^3$ ) for  $\text{C}(\text{NH}_2)_3\text{CH}_3\text{SO}_3$ .

| Atom | <i>x</i> | <i>y</i> | <i>z</i> | $U_{(\text{eq})}$ |
|------|----------|----------|----------|-------------------|
| H2A  | 8571.58  | 8930     | 3732.17  | 94                |
| H2B  | 7521.68  | 0        | 2612.17  | 94                |
| H1A  | 2908.85  | 6549.87  | 4629.68  | 54                |
| H1B  | 1908.85  | 7479.87  | 3729.58  | 54                |
| H2   | 359.96   | 4050     | 2189.84  | 63                |

**Table S7.** Calculated bandgap for  $\text{C}(\text{NH}_2)_3\text{CH}_3\text{SO}_3$ ,  $\beta$ -/ $\gamma$ - $\text{C}(\text{NH}_2)_3\text{Cl}$  and  $\text{NH}_2\text{COF}$ .

|       | $\text{C}(\text{NH}_2)_3\text{CH}_3\text{SO}_3$ | $\beta$ - $\text{C}(\text{NH}_2)_3\text{Cl}$ | $\gamma$ - $\text{C}(\text{NH}_2)_3\text{Cl}$ | $\text{NH}_2\text{COF}$ |
|-------|-------------------------------------------------|----------------------------------------------|-----------------------------------------------|-------------------------|
| GGA   | 5.21 eV                                         | 4.96 eV                                      | 4.93 eV                                       | 6.15 eV                 |
| HSE06 | 6.71 eV                                         | 6.49 eV                                      | 6.51 eV                                       | 7.87 eV                 |

**Table S8.** Birefringence of selected DUV metal-free compounds and metal-containing optical crystals.

|                                                                                                     | $\lambda_{\text{Cutoff}}$ (nm) | Bandgap (eV)      | $\Delta n$          | Reference |
|-----------------------------------------------------------------------------------------------------|--------------------------------|-------------------|---------------------|-----------|
| Metal containing compounds                                                                          |                                |                   |                     |           |
| $\alpha$ -BaB <sub>2</sub> O <sub>4</sub>                                                           | 189                            | 4.96              | 0.116 <sup>1</sup>  | 1         |
| LiBO <sub>2</sub>                                                                                   | 164                            | 6.49              | 0.136 <sup>2</sup>  | 2         |
| Ca(BO <sub>2</sub> ) <sub>2</sub>                                                                   | 169                            | 7.34              | 0.124 <sup>2</sup>  | 3         |
| KF·B(OH) <sub>3</sub>                                                                               | <190                           | 7.63 <sup>a</sup> | 0.114 <sup>2</sup>  | 4         |
| Na <sub>3</sub> F(B <sub>3</sub> O <sub>6</sub> ) <sub>2</sub>                                      | 175                            | 7.09              | 0.102 <sup>3</sup>  | 5         |
| Ba <sub>2</sub> Mg(B <sub>3</sub> O <sub>6</sub> ) <sub>2</sub>                                     | 187                            | 6.63              | 0.098 <sup>3</sup>  | 6         |
| BaZnB <sub>4</sub> O <sub>8</sub>                                                                   | 180                            | 6.89              | 0.14 <sup>4</sup>   | 7         |
| LiB <sub>5</sub> O <sub>5</sub> F <sub>2</sub> (OH) <sub>4</sub>                                    | <190                           | 7.99 <sup>a</sup> | 0.124 <sup>5</sup>  | 8         |
| Rb[B <sub>3</sub> O <sub>3</sub> F <sub>2</sub> (OH) <sub>2</sub> ]                                 | <200                           | 7.46 <sup>a</sup> | 0.09 <sup>6</sup>   | 9         |
| KB <sub>3</sub> O <sub>4</sub> F <sub>2</sub>                                                       | /                              | 6.80 <sup>a</sup> | 0.096 <sup>5</sup>  | 10        |
| LiNaB <sub>6</sub> O <sub>9</sub> F <sub>2</sub>                                                    | <190                           | 7.47 <sup>a</sup> | 0.067 <sup>2</sup>  | 11        |
| NaB <sub>4</sub> O <sub>6</sub> F                                                                   | <180                           | 7.57              | 0.12 <sup>2</sup>   | 12        |
| CsB <sub>4</sub> O <sub>6</sub> F                                                                   | 155                            | 8.01              | 0.115 <sup>7</sup>  | 13        |
| SrB <sub>5</sub> O <sub>7</sub> F <sub>3</sub>                                                      | <180                           | 8.58 <sup>a</sup> | 0.07 <sup>2</sup>   | 14        |
| RbB <sub>4</sub> O <sub>6</sub> F                                                                   | <190                           | 7.73 <sup>a</sup> | 0.102 <sup>2</sup>  | 15        |
| NH <sub>4</sub> [LiC <sub>3</sub> H(CH <sub>3</sub> )O <sub>4</sub> ]                               | <190                           | 7.58 <sup>b</sup> | 0.06 <sup>6</sup>   | 16        |
| NaZnCO <sub>3</sub> (OH)                                                                            | 200                            | 6.20              | 0.114 <sup>2</sup>  | 17        |
| Li <sub>2</sub> CsB <sub>7</sub> O <sub>10</sub> (OH) <sub>4</sub>                                  | <190                           | 6.35              | 0.0612 <sup>2</sup> | 18        |
| Cs <sub>3</sub> [(BOP) <sub>2</sub> (B <sub>3</sub> O <sub>7</sub> ) <sub>3</sub> ]                 | 165                            | 7.52              | 0.075 <sup>8</sup>  | 19        |
| Sr(NH <sub>2</sub> SO <sub>3</sub> ) <sub>2</sub>                                                   | <190                           | 7.32              | 0.03 <sup>2</sup>   | 20        |
| Ba(CH <sub>3</sub> SO <sub>3</sub> ) <sub>2</sub>                                                   | 159                            | 7.80              | 0.04 <sup>4</sup>   | 21        |
| Ba <sub>3</sub> P <sub>3</sub> O <sub>10</sub> Cl                                                   | 180                            | 6.89              | 0.023 <sup>2</sup>  | 22        |
| Metal-free compounds                                                                                |                                |                   |                     |           |
| NH <sub>4</sub> B <sub>4</sub> O <sub>6</sub> F                                                     | 156                            | 7.95              | 0.1184 <sup>7</sup> | 23        |
| C(NH <sub>2</sub> ) <sub>3</sub> SO <sub>3</sub> F                                                  | 200                            | 6.20              | 0.133 <sup>2</sup>  | 24        |
| GBF1                                                                                                | 190                            | 6.53              | 0.173 <sup>2</sup>  | 25        |
| GBF2                                                                                                | 195                            | 6.36              | 0.162 <sup>2</sup>  | 25        |
| C(NH <sub>2</sub> ) <sub>3</sub> BF <sub>4</sub>                                                    | 193                            | 6.42              | 0.113 <sup>3</sup>  | 26        |
| (N <sub>2</sub> H <sub>6</sub> )[HPO <sub>3</sub> F] <sub>2</sub>                                   | <200                           | 6.51              | 0.077 <sup>2</sup>  | 27        |
| (NH <sub>4</sub> ) <sub>4</sub> [B <sub>12</sub> O <sub>16</sub> F <sub>4</sub> (OH) <sub>4</sub> ] | <200                           | 7.10              | 0.116 <sup>6</sup>  | 28        |
| (NH <sub>4</sub> ) <sub>2</sub> B <sub>4</sub> SO <sub>10</sub>                                     | 184                            | 6.74              | 0.056 <sup>2</sup>  | 29        |
| SO <sub>2</sub> (NH <sub>2</sub> ) <sub>2</sub>                                                     | 160                            | 7.75              | 0.07 <sup>4</sup>   | 30        |
| NH <sub>3</sub> BH <sub>3</sub>                                                                     | <190                           | 7.48              | 0.055 <sup>9</sup>  | 31        |
| C(NH <sub>2</sub> ) <sub>3</sub> CH <sub>3</sub> SO <sub>3</sub>                                    | <190                           | 6.71 <sup>a</sup> | 0.166 <sup>2</sup>  | This work |
| $\beta$ -C(NH <sub>2</sub> ) <sub>3</sub> Cl                                                        | ~191                           | 6.49 <sup>a</sup> | 0.201 <sup>2</sup>  | This work |
| $\gamma$ -C(NH <sub>2</sub> ) <sub>3</sub> Cl                                                       | ~190                           | 6.51 <sup>a</sup> | 0.211 <sup>2</sup>  | This work |
| NH <sub>2</sub> COF                                                                                 | ~159                           | 7.85 <sup>a</sup> | 0.241 <sup>2</sup>  | This work |

<sup>a</sup> By HSE06 functional; <sup>b</sup> by PBE0 functional.

<sup>1</sup> @1064 nm; <sup>2</sup> @1064 nm (calculated); <sup>3</sup> @1014 nm; <sup>4</sup> @589.3 nm; <sup>5</sup> @546 nm (calculated); <sup>6</sup> @546 nm; <sup>7</sup> @964.8 nm; <sup>8</sup> @532 nm; <sup>9</sup> @550 nm.

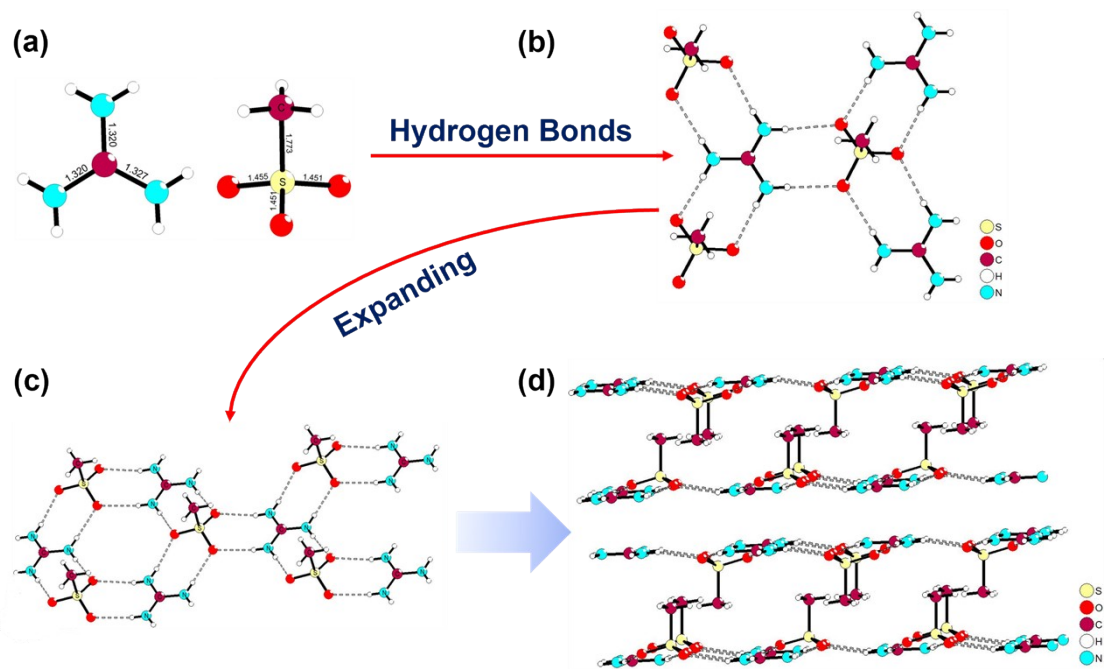

**Fig. S1** (a) Functional basic building blocks of  $C(NH_2)_3CH_3SO_3$ ; (b) Hydrogen bonds around  $[C(NH_2)_3]^+$  and  $CH_3SO_3^-$ ; (c) Single layer of  $[C(NH_2)_3 \cdot CH_3SO_3]$ ; and (d) Structures of  $C(NH_2)_3CH_3SO_3$ .

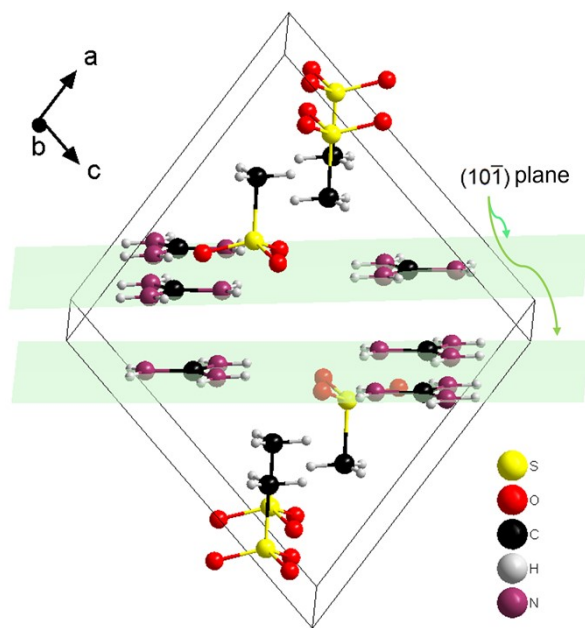

**Fig. S2** Crystal plane of  $[C(NH_2)_3]^+$  located in the structure of  $C(NH_2)_3CH_3SO_3$ .

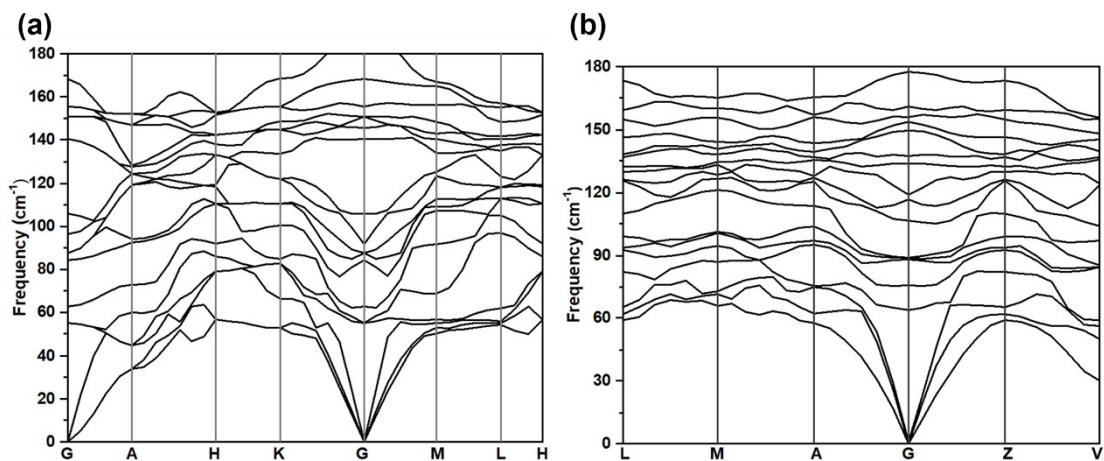

**Fig. S3** Phonon dispersion of (a)  $\beta$ -C(NH<sub>2</sub>)<sub>3</sub>Cl and (b)  $\gamma$ -C(NH<sub>2</sub>)<sub>3</sub>Cl.

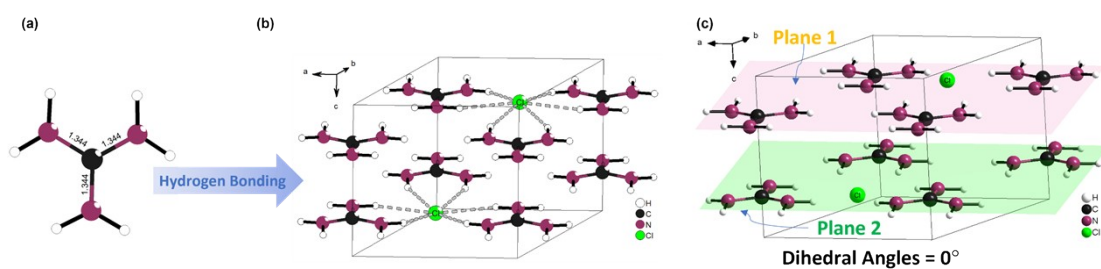

**Fig. S4** Ball-and-stick representations of (a) [C(NH<sub>2</sub>)<sub>3</sub>]<sup>+</sup>; (b) and (c) Structure of  $\beta$ -C(NH<sub>2</sub>)<sub>3</sub>Cl.

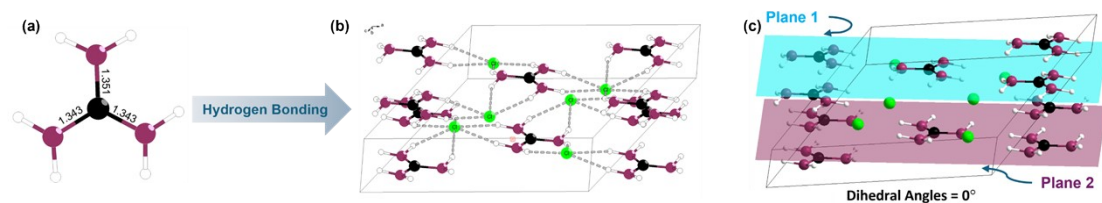

**Fig. S5** Ball-and-stick representations of (a) [C(NH<sub>2</sub>)<sub>3</sub>]<sup>+</sup>; (b) and (c) Structure of  $\gamma$ -C(NH<sub>2</sub>)<sub>3</sub>Cl.

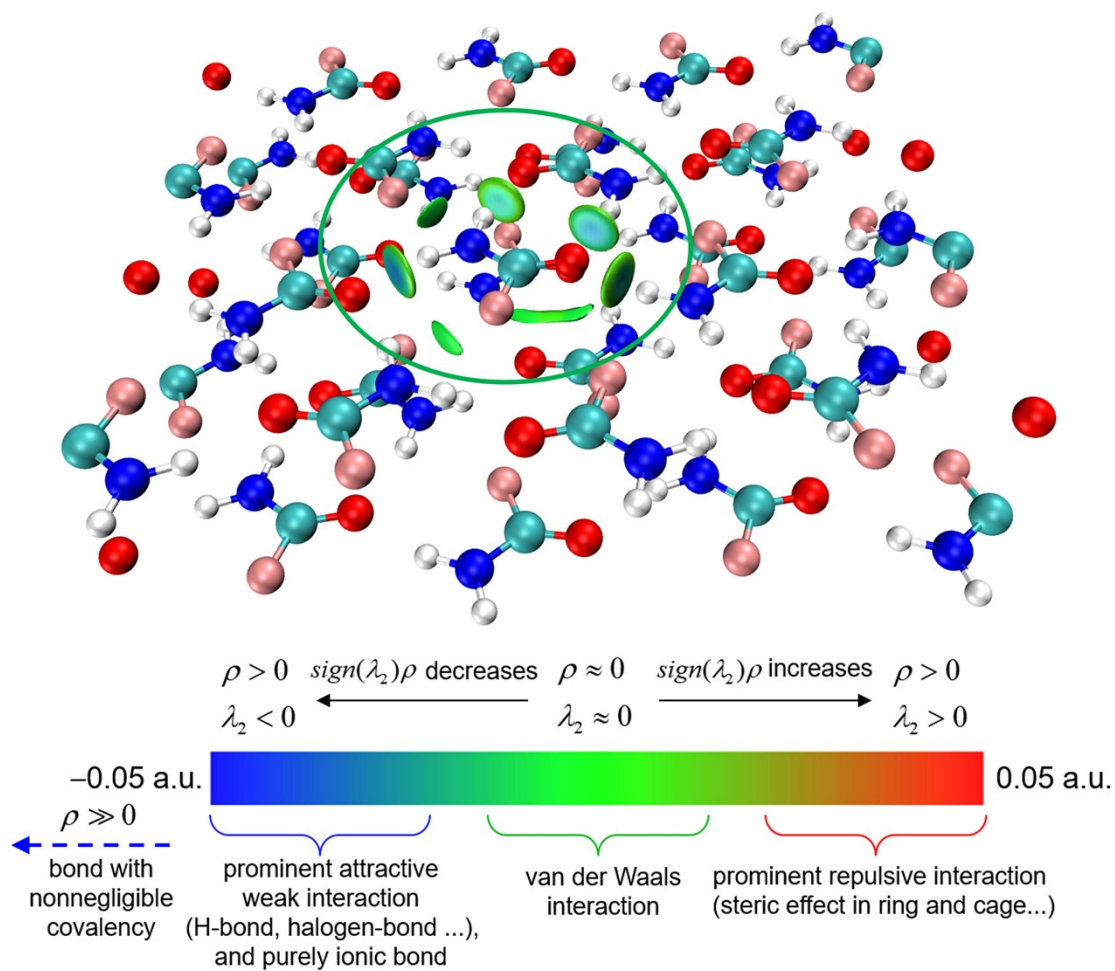

**Fig. S6** Independent gradient model based on Hirshfeld partition (IGMH) analyses of  $\text{NH}_2\text{COF}$ .



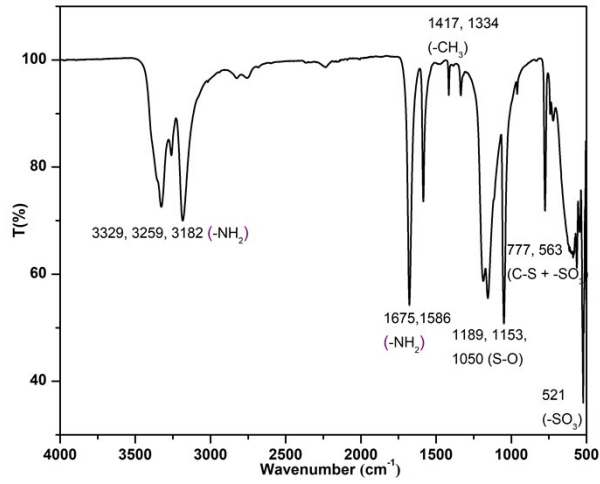

**Fig. S7** IR spectrum of  $C(NH_2)_3CH_3SO_3$ .

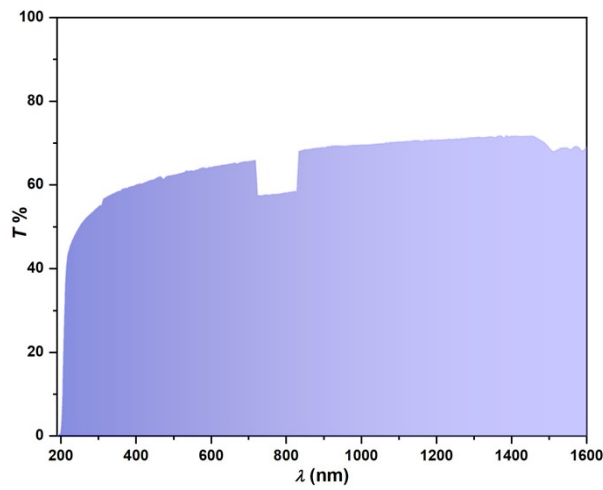

**Fig. S8** UV-vis-NIR transmittance spectrum for  $C(NH_2)_3CH_3SO_3$ .

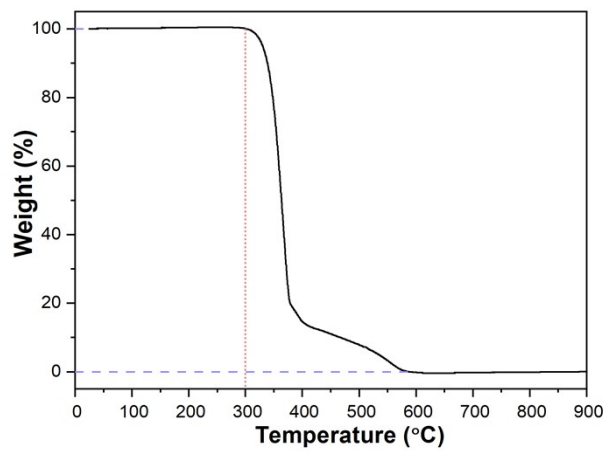

**Fig. S9** TGA diagram for  $C(NH_2)_3CH_3SO_3$ .

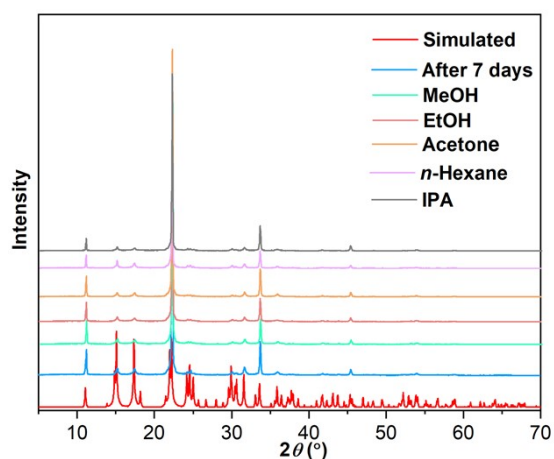

**Fig. S10** The chemical stability and air stability test of  $C(NH_2)_3CH_3SO_3$ .

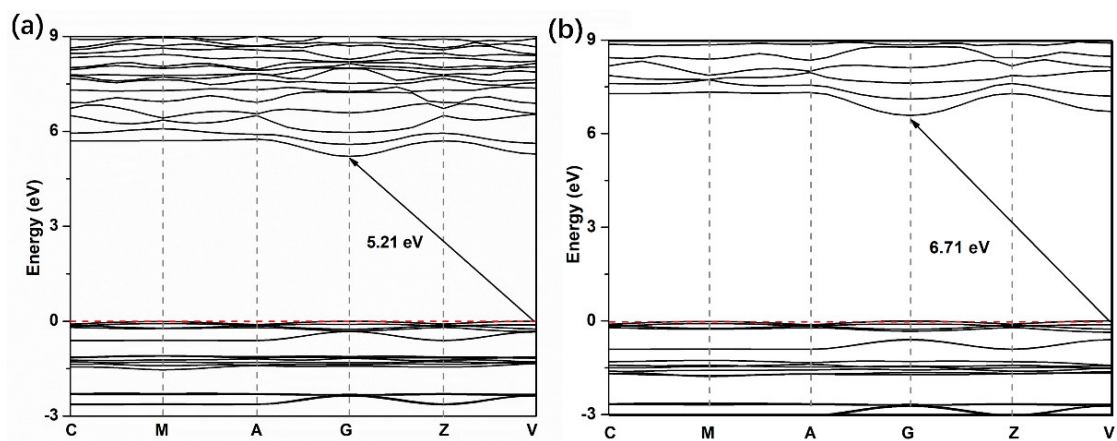

**Fig. S11** Calculated band structure by GGA (a) and HSE06 (b) for  $C(NH_2)_3CH_3SO_3$ .

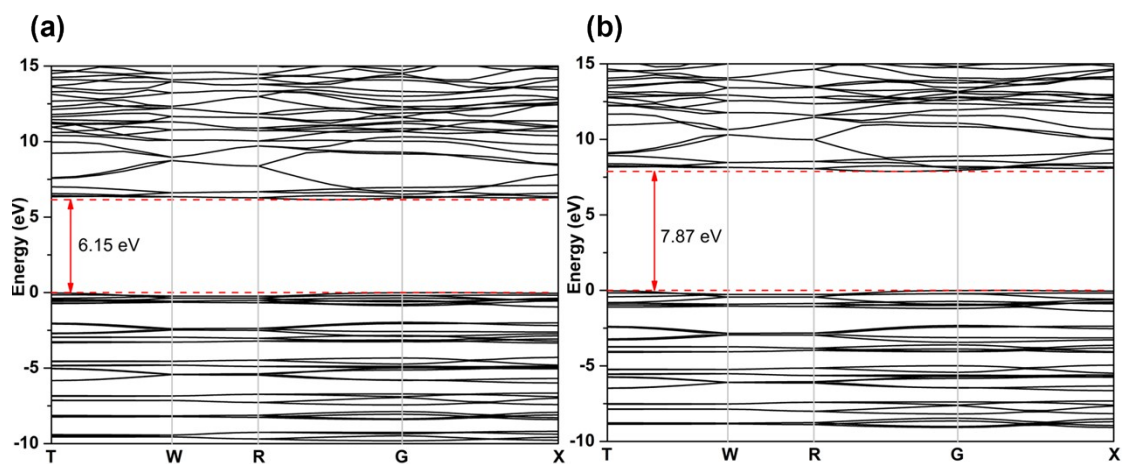

**Fig. S12** Calculated band structure by GGA (a) and HSE06 (b) for  $NH_2COF$ .

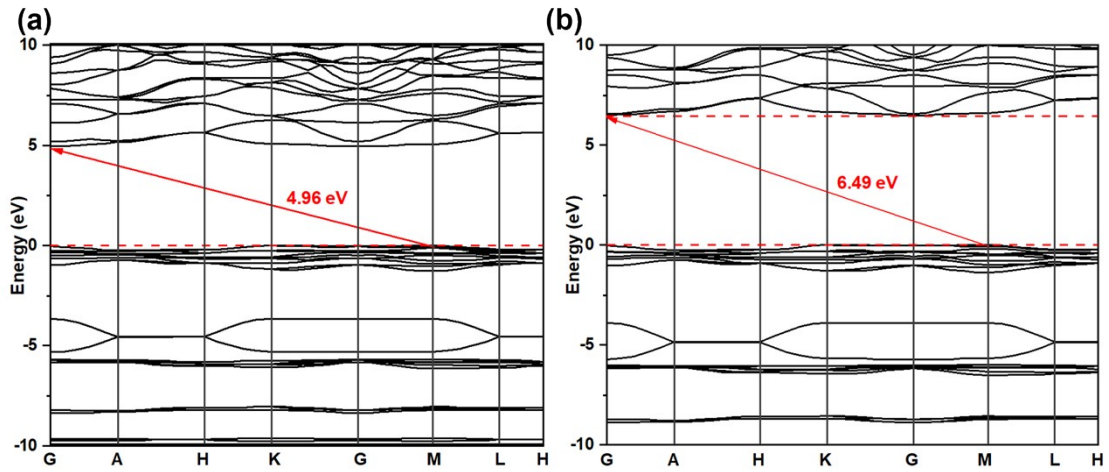

**Fig. S13** Calculated band structure by GGA (a) and HSE06 (b) for  $\beta$ -C(NH<sub>2</sub>)<sub>3</sub>Cl.

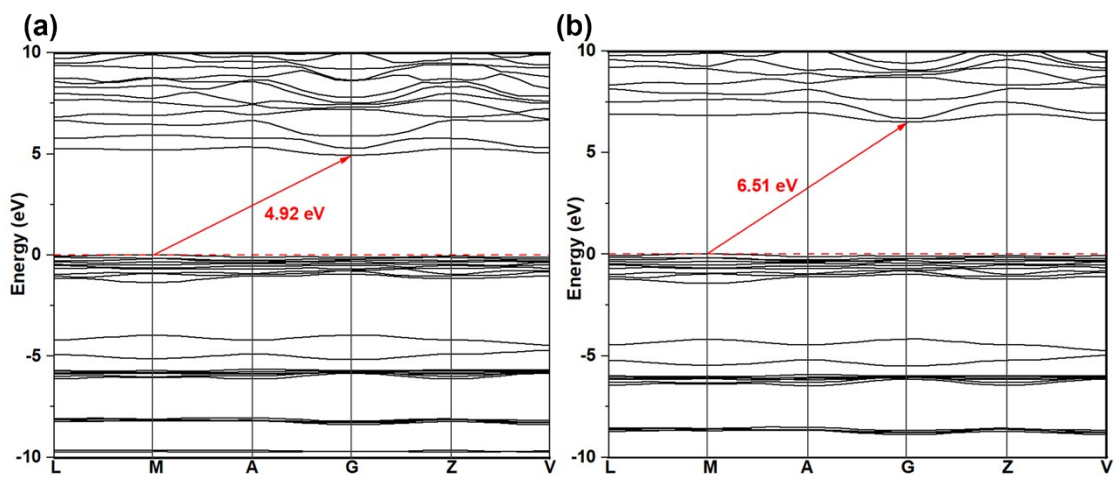

**Fig. S14** Calculated band structure by GGA (a) and HSE06 (b) for  $\gamma$ -C(NH<sub>2</sub>)<sub>3</sub>Cl.

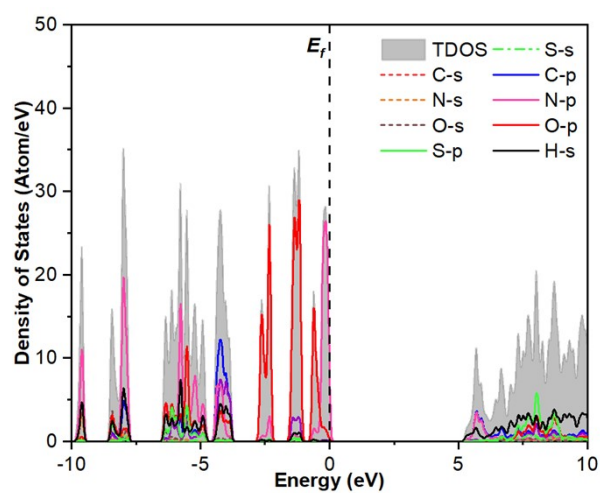

**Fig. S15** Density of states for C(NH<sub>2</sub>)<sub>3</sub>CH<sub>3</sub>SO<sub>3</sub>.

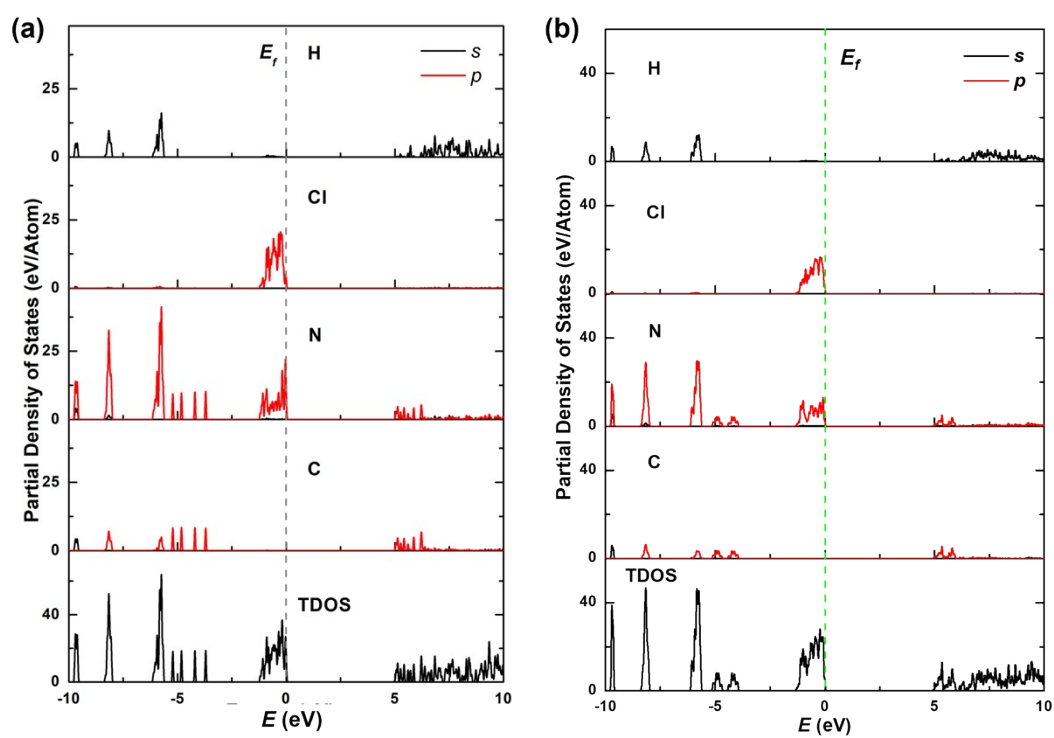

**Fig. S16** Density of states for (a)  $\beta\text{-C}(\text{NH}_2)_3\text{Cl}$  and (b)  $\gamma\text{-C}(\text{NH}_2)_3\text{Cl}$ .

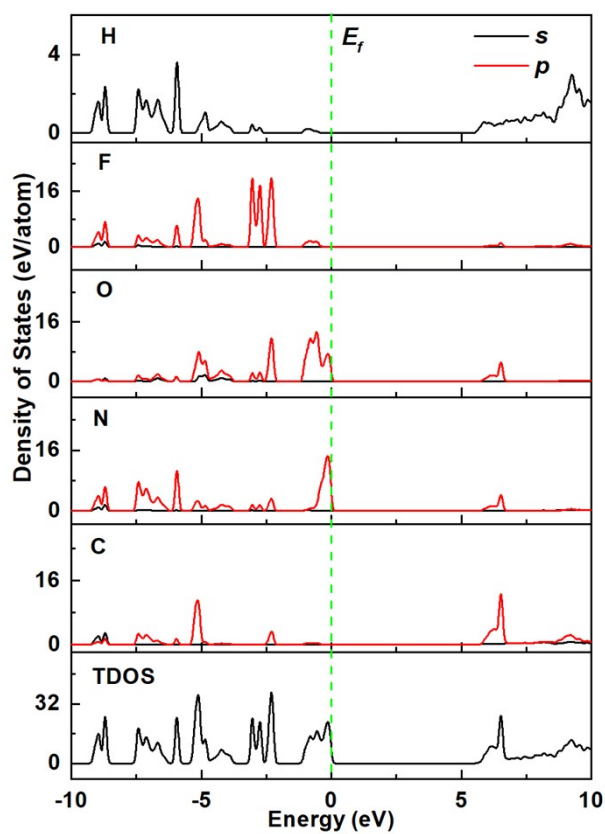

Fig. S17 Density of states for  $\text{NH}_2\text{COF}$ .

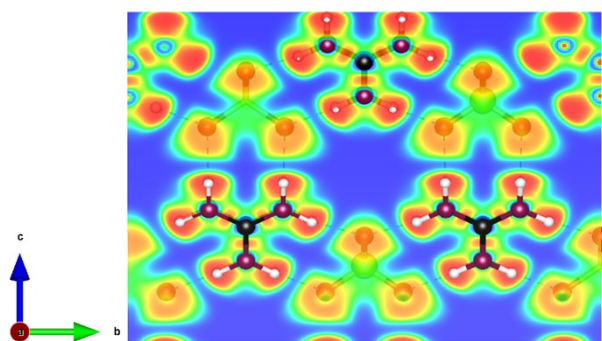

Fig. S18 ELF diagram for  $\text{C}(\text{NH}_2)_3\text{CH}_3\text{SO}_3$ .

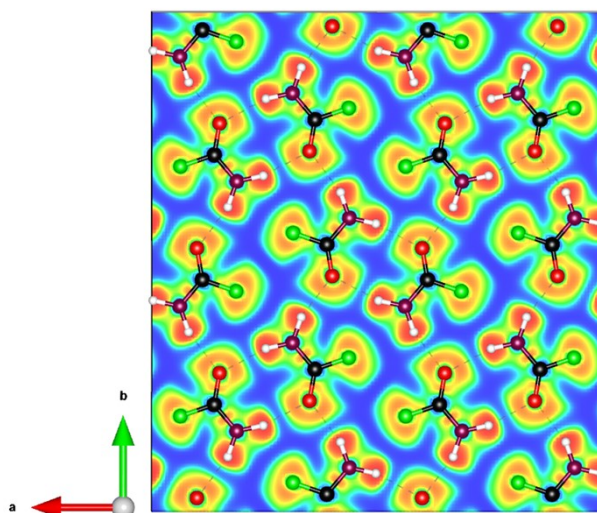

**Fig. S19** ELF diagram for  $\text{NH}_2\text{COF}$ .

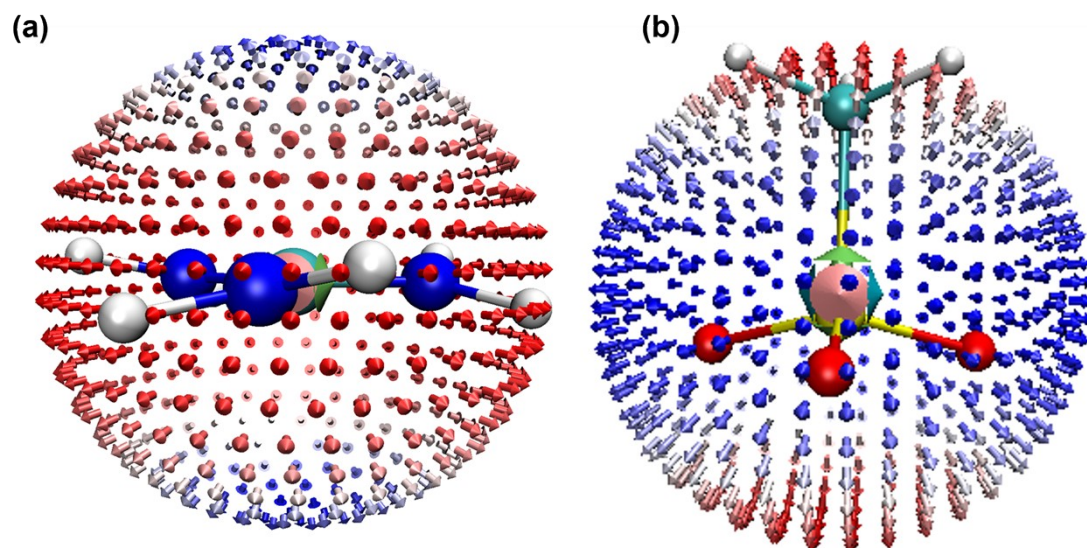

**Fig. S20** Unit sphere representations of polarizability for (a)  $[\text{C}(\text{NH}_2)_3]^+$  and (b)  $\text{CH}_3\text{SO}_3^-$  under a static electric field. Longer and redder radial arrows indicate a larger tensor value in the corresponding direction.



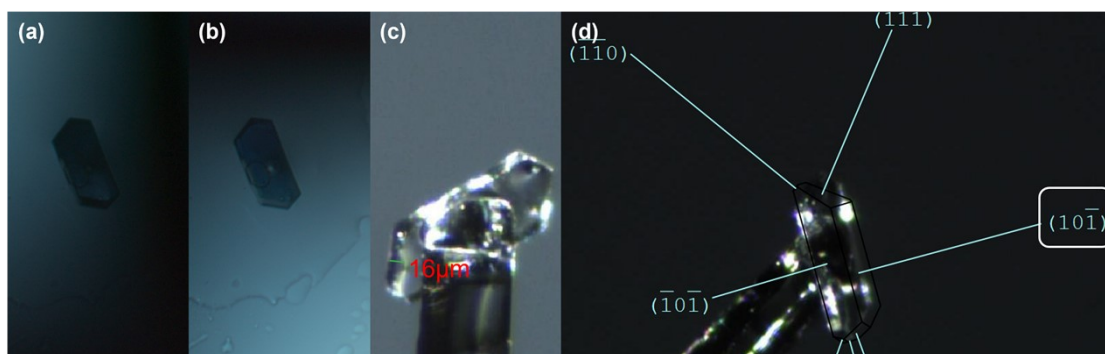

**Fig. S21** Birefringence measurement on  $(10\bar{1})$  crystal plane of  $C(NH_2)_3CH_3SO_3$  crystal. (a) and (b) achieving complete extinction under a polarizing microscope; (c) thickness of selected crystal and (d) crystal orientation observed via the single-crystal XRD.

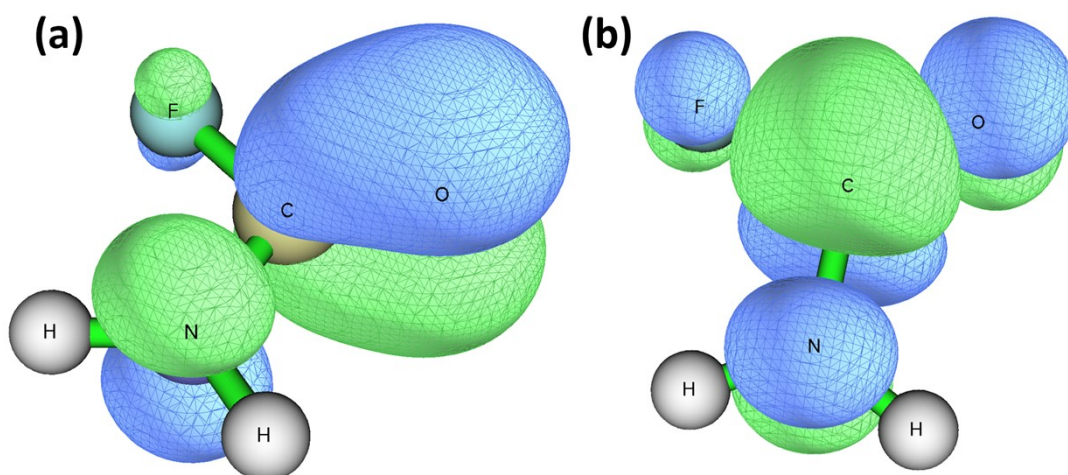

**Fig. S22** (a) HOMO energy gap and (b) LUMO energy gap for  $NH_2COF$ .

## References

- 1 G. Zhou, J. Xu, X. Chen, H. Zhong, S. Wang, K. Xu, P. Deng and F. Gan, *J. Cryst. Growth*, 1998, **191**, 517–519.
- 2 F. Zhang, X. Chen, M. Zhang, W. Jin, S. Han, Z. Yang and S. Pan, *Light Sci. Appl.*, 2022, **11**, 0–7.
- 3 X. Chen, B. Zhang, F. Zhang, Y. Wang, M. Zhang, Z. Yang, K. R. Poeppelmeier and S. Pan, *J. Am. Chem. Soc.*, 2018, **140**, 16311–16319.
- 4 Y. Li, X. Chen and K. M. Ok, *Chem. Commun.*, 2022, **58**, 8770–8773.
- 5 H. Zhang, M. Zhang, S. Pan, Z. Yang, Z. Wang, Q. Bian, X. Hou, H. Yu, F. Zhang, K. Wu, F. Yang, Q. Peng, Z. Xu, K. B. Chang and K. R. Poeppelmeier, *Cryst. Growth Des.*, 2015, **15**, 523–529.
- 6 X. Lv, P. Wang, H. Yu, Y. Hu, H. Zhang, C. Qiu, J. Li, X. Wang, B. Liu and Y. Zhang, *Opt. Mater. Express*, 2019, **9**, 3835.
- 7 J. Han, K. Liu, L. Chen, F. Li, Z. Yang, F. Zhang, S. Pan and M. Mutailipu, *Chem. - A Eur. J.*, 2023, **29**, 4–10.
- 8 Z. Chen, H. Zeng, D. Chu, F. Zhang, M. Cheng, Z. Yang and S. Pan, *Sci. China Mater.*, 2022, **2**, 1–6.
- 9 Z. Chen, F. Li, Y. Liu, C. Cui and M. Mutailipu, *Inorg. Chem.*, 2023, **62**, 14512–14517.
- 10 B. Cheng, W. Ma, A. Tudi, F. Zhang, Z. Chen, X. Hou, Z. Yang and S. Pan, *Chem. Mater.*, 2023, **35**, 5671–5679.
- 11 X. Li, Z. Chen, F. Li, F. Zhang, Z. Yang and S. Pan, *Adv. Opt. Mater.*, 2023, **11**, 2202195.
- 12 Z. Zhang, Y. Wang, B. Zhang, Z. Yang and S. Pan, *Angew. Chem. Int. Ed.*, 2018, **57**, 6577–6581.
- 13 X. Wang, Y. Wang, B. Zhang, F. Zhang, Z. Yang and S. Pan, *Angew. Chem. Int. Ed.*, 2017, **56**, 14119–14123.
- 14 M. Mutailipu, M. Zhang, B. Zhang, L. Wang, Z. Yang, X. Zhou and S. Pan, *Angew. Chem. Int. Ed.*, 2018, **57**, 6095–6099.
- 15 Y. Wang, B. Zhang, Z. Yang and S. Pan, *Angew. Chem. Int. Ed.*, 2018, **57**, 2150–2154.
- 16 H. Tian, C. Lin, Y. Zhou, X. Zhao, H. Fan, T. Yan, N. Ye and M. Luo, *Angew. Chem. Int. Ed.*, 2023, **62**, e202304858.
- 17 G. Peng, C. Lin and N. Ye, *J. Am. Chem. Soc.*, 2020, **142**, 20542–20546.
- 18 J. H. Huang, C. C. Jin, P. L. Xu, P. Gong, Z. Lin, J. W. Cheng and G. Y. Yang, *Inorg. Chem.*, 2019, **58**, 1755–1758.
- 19 H. Liu, H. Wu, Z. Hu, J. Wang, Y. Wu and H. Yu, *J. Am. Chem. Soc.*, 2023, **145**, 12691–12700.
- 20 X. Hao, M. Luo, C. Lin, G. Peng, F. Xu and N. Ye, *Angew. Chem. Int. Ed.*, 2021, **60**, 7621–7625.
- 21 H. Tian, C. Lin, X. Zhao, F. Xu, C. Wang, N. Ye and M. Luo, *CCS Chem.*, 2023, **2**, 1–9.
- 22 P. Yu, L. M. Wu, L. J. Zhou and L. Chen, *J. Am. Chem. Soc.*, 2014, **136**, 480–487.



- 23 G. Shi, Y. Wang, F. Zhang, B. Zhang, Z. Yang, X. Hou, S. Pan and K. R. Poeppelmeier, *J. Am. Chem. Soc.*, 2017, **139**, 10645–10648.
- 24 M. Luo, C. Lin, D. Lin and N. Ye, *Angew. Chem. Int. Ed.*, 2020, **59**, 15978–15981.
- 25 C. Jin, H. Zeng, F. Zhang, H. Qiu, Z. Yang, M. Mutailipu and S. Pan, *Chem. Mater.*, 2022, **34**, 440–450.
- 26 M. Mutailipu, J. Han, Z. Li, F. Li, J. Li, F. Zhang, X. Long, Z. Yang and S. Pan, *Nat. Photonics*, 2023, **17**, 694–701.
- 27 H. Qiu, F. Li, C. Jin, J. Lu, Z. Yang, S. Pan and M. Mutailipu, *Chem. Commun.*, 2022, 5594–5597.
- 28 C. Jin, F. Li, B. Cheng, H. Qiu, Z. Yang, S. Pan and M. Mutailipu, *Angew. Chem. Int. Ed.*, 2022, **61**, e202203984.
- 29 Z. Li, W. Jin, F. Zhang, Z. Chen, Z. Yang and S. Pan, *Angew. Chem. Int. Ed.*, 2021, **61**, e202112844.
- 30 H. Tian, N. Ye and M. Luo, *Angew. Chem. Int. Ed.*, 2022, **61**, e202200395.
- 31 Y. Zhou, N. He, Z. Lin, X. Shang, X. Chen, Y. Li, W. Huang, M. Hong, S. Zhao and J. Luo, *Small*, 2024, **20**, 1–7.
